# Supplementary material
Source: PubMed Central journal article supplement (PMC3624806)
Supplement: supp_btt086_quast_supplement_updated.pdf [file supp_btt086_quast_supplement_updated.pdf]

# Supplement for “QUAST: Quality Assessment Tool for Genome Assemblies”

## 1 Supplementary Methods

### 1.1 Misassemblies

QUAST evaluates the number of misassemblies in an assembly, using Plantagora’s definition. Plantagora defines a *misassembly breakpoint* as a position in the assembled contigs where the left flanking sequence aligns over 1 kb away from the right flanking sequence on the reference, or they overlap by more than 1 kb, or the flanking sequences align on opposite strands or different chromosomes. QUAST also generates a report with the number of misassemblies due to each of these reasons. QUAST’s classification of all three cases is shown in Supplementary Fig. S1.

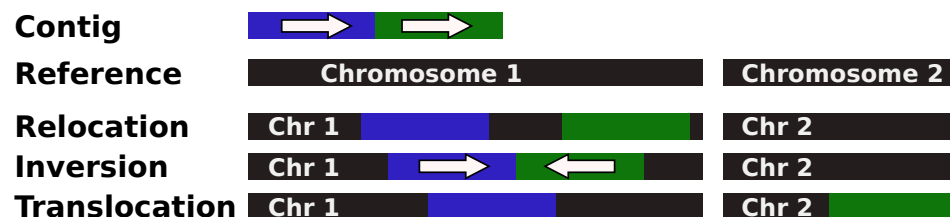

**Supplementary Fig. S1:** Classification of misassemblies. A *relocation* is a misassembly in which the left and right flanking sequences both align to the same chromosome on the reference, but they are either over 1 kb apart or they overlap by over 1 kb. As long as these distance thresholds are exceeded, the strands on which they align are not considered. An *inversion* is a misassembly in which the left and right flanking sequences both align to the same chromosome but on opposite strands, and further, they do not meet the distance thresholds to be classified as a relocation. A *translocation* is a misassembly in which the flanking sequences align on different chromosomes.

In addition, the QUAST report contains information about *local misassemblies*. We define a *local misassembly breakpoint* as a breakpoint that satisfies these conditions:

1. Two or more distinct alignments cover the breakpoint.
2. The gap between left and right flanking sequences is less than 1 kb.
3. The left and right flanking sequences both are on the same strand of the same chromosome of the reference genome.

### 1.2 N<sub>Ax</sub> and N<sub>GAx</sub> metrics

*N<sub>Ax</sub>* (*A* stands for *aligned*, and *x* is a number from 0 to 100): This is a combination of the well-known *N<sub>x</sub>* metric and Plantagora’s number of misassemblies metric.

It is computed in two steps. First, we break the contigs into aligned blocks. If a contig has misassembly breakpoints, it is broken into multiple blocks at these breakpoints. Additionally, if there are unaligned regions within a contig, these regions are removed and the contig is split into blocks.

Next, we compute the ordinary *N<sub>x</sub>* statistic on these blocks instead of on the original contigs. Note that the length of a block may differ slightly from the length of the reference region to which it aligns, due to small indels; we use the length of the block in the contig, rather than the aligned reference region. Thus, all four of *N<sub>x</sub>*, *N<sub>Gx</sub>*, *N<sub>Ax</sub>*, and *N<sub>GAx</sub>* (defined below) are based on lengths of contigs or portions of contigs, ensuring that  $N_{Ax} \leq N_x$  and  $N_{GAx} \leq N_{Gx}$ .

We illustrate the *N<sub>Ax</sub>* metric in Supplementary Fig. S2. We compare the contigs of two assemblers, A and B, by focusing on N50 (to measure contig sizes) and the number of misassemblies. Suppose that assemblers A and B generate nearly identical assemblies, except that some contigs that are separate in assembly A are merged together in

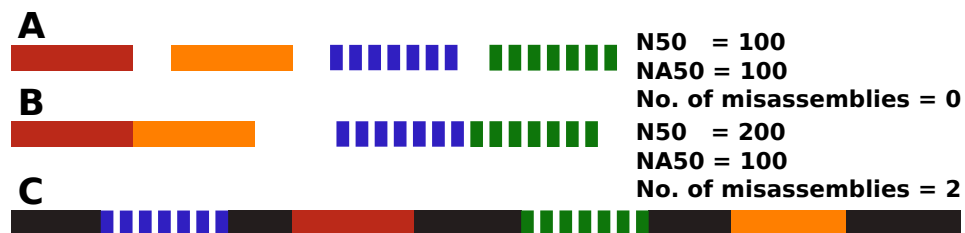

**Supplementary Fig. S2:** Example of computing NA50. From top to bottom: assembly A (4 contigs), assembly B (2 contigs), alignment of contigs to reference genome C.

assembly B in order to increase the N50 statistic and make assembly B appear to be better. Of course, this comes at the expense of increasing the number of misassemblies. It may thus be confusing that assembly B appears to be better than assembly A in terms of N50, but worse than assembly A in terms of number of misassemblies.

The NA50 metric resolves this confusion. This metric splits merged contigs into separate blocks that are equal for both assemblers, so the value of NA50 is the same for assemblies A and B, while the number of misassemblies is higher in assembly B. Thus, assembly A is the better assembly.

The NGAx metric is defined similarly to NAX: first break the contigs into aligned blocks, but then compute the NGx statistic (instead of Nx) on the aligned blocks. An NGAx plot for *E. coli* is shown in Supplementary Fig. S9. IDBA-UD and SPAdes are the winners on the NGAx metric. SPAdes is the winner for  $x > 30$ , including NGA50 and NGA75, but IDBA-UD is the winner on smaller  $x$ . This is because the six largest contigs in IDBA-UD are larger than in SPAdes, but the remaining contigs are larger in SPAdes than in IDBA-UD. Unlike the standard Nx or NGx metrics, the NGAx metric breaks contigs at misassembly events; thus, misassemblies do not artificially inflate these metrics. It turns out that the misassemblies in SPAdes and IDBA-UD are in shorter contigs, and their higher number of misassemblies as compared to the Velvet-based assemblers does not diminish the use of this comparison. Supplementary Table 4 also shows that the total lengths of all misassembled contigs of SPAdes and IDBA-UD are rather small (46584 bp and 57334 bp, respectively).

## 2 QUAST performance

We benchmarked QUAST on three data sets: *E. coli*, *H. sapiens* chromosome 14, and *B. impatiens*. See Supplementary Table 1 for performance results. All benchmarking was done on a 4 CPU (Intel Xeon X7560 2.27GHz) computer. When running QUAST with a reference genome (*E. coli* and *H. sapiens*), the most time-consuming step is alignment, performed by the Nucmer aligner from MUMmer v3.23 (Kurtz *et al.*, 2004). When we ran QUAST on *B. impatiens* assemblies, for which a finished assembly does not exist at the time of this writing, the most time-consuming step was gene prediction, performed by GlimmerHMM (Majoros *et al.*, 2004). Note that alignment and gene prediction are parallelized, with each assembly processed by a separate thread, so QUAST will produce better results on computers with more CPUs.

**Supplementary Table S1:** QUAST performance

| Genome                      | Genome size    | No. of assemblies | Total time | Most time-consuming step  |
|-----------------------------|----------------|-------------------|------------|---------------------------|
| <i>E. coli</i>              | 4.6 Mb         | 7                 | 0:01:00    | 0:00:21 (alignment)       |
| <i>H. sapiens</i> , chr. 14 | 88.3 Mb        | 8                 | 3:53:40    | 3:34:33 (alignment)       |
| <i>B. impatiens</i>         | approx. 250 Mb | 4                 | 1:18:48    | 1:16:21 (gene prediction) |

### 3 QUASt report on single-cell *E. coli*

**Genome size:** 4.6 Mb. The reference genome is *E. coli* str. K-12 substr. MG1655, available at the NCBI website.

**Number of genes:** 4324. Gene annotations were taken from <http://www.ecogene.org/>.

**Number of operons:** 884. Operon annotations were taken from <http://csbl1.bmb.uga.edu/OperonDB/displayNC.php?id=215>.

**Only contigs of length  $\geq 200$  bp are used.**

The data set and some of its assemblies are taken from Chitsaz *et al.* (2011). The SPAdes and IDBA-UD assemblies are new.

**Supplementary Table S2:** Main table for *E. coli*.

| Assembly              | EULER-SR | E+V-SC   | IDBA-UD       | SOAPdenovo | SPAdes       | Velvet   | Velvet-SC |
|-----------------------|----------|----------|---------------|------------|--------------|----------|-----------|
| No. of contigs        | 610      | 396      | <b>283</b>    | 817        | 532          | 310      | 617       |
| NGA50                 | 26580    | 32051    | 90607         | 16606      | <b>99913</b> | 22648    | 19791     |
| Largest contig        | 140518   | 132865   | <b>224018</b> | 87533      | 211020       | 132865   | 121367    |
| Total length          | 4306898  | 4555721  | 4734432       | 4183037    | 4975641      | 3517182  | 4556809   |
| Genome fraction (%)   | 86.544   | 93.577   | 95.896        | 81.360     | 96.993       | 75.528   | 93.309    |
| No. of misassemblies  | 19       | <b>2</b> | 9             | 6          | 11           | <b>2</b> | <b>2</b>  |
| No. of complete genes | 3442     | 3816     | 4030          | 3060       | <b>4071</b>  | 3121     | 3662      |

**Supplementary Table S3:** Misassemblies report for *E. coli*.

| Assembly                    | EULER-SR | E+V-SC   | IDBA-UD   | SOAPdenovo | SPAdes | Velvet       | Velvet-SC |
|-----------------------------|----------|----------|-----------|------------|--------|--------------|-----------|
| No. of misassemblies        | 19       | <b>2</b> | 9         | 6          | 11     | <b>2</b>     | <b>2</b>  |
| No. of relocations          | 16       | <b>2</b> | 6         | 5          | 5      | <b>2</b>     | <b>2</b>  |
| No. of translocations       | 0        | 0        | 0         | 0          | 0      | 0            | 0         |
| No. of inversions           | 3        | <b>0</b> | 3         | 1          | 6      | <b>0</b>     | <b>0</b>  |
| No. of misassembled contigs | 17       | <b>2</b> | 9         | 6          | 11     | <b>2</b>     | <b>2</b>  |
| Misassembled contigs length | 257468   | 23485    | 57334     | 96583      | 46584  | <b>16522</b> | 22359     |
| No. of local misassemblies  | 89       | 6        | 15        | 216        | 8      | <b>1</b>     | 2         |
| No. of mismatches           | 390      | 89       | <b>59</b> | 4419       | 516    | 78           | 79        |
| No. of indels               | 8916     | 35       | <b>5</b>  | 437        | 34     | 44           | 44        |

**Supplementary Table S4:** Extended report for *E. coli*.

| Assembly                          | EULER-SR        | E+V-SC          | IDBA-UD         | SOAPdenovo      | SPAdes                 | Velvet             | Velvet-SC       |
|-----------------------------------|-----------------|-----------------|-----------------|-----------------|------------------------|--------------------|-----------------|
| No. of contigs                    | 610             | 396             | <b>283</b>      | 817             | 532                    | 310                | 617             |
| Largest contig                    | 140518          | 132865          | <b>224018</b>   | 87533           | 211020                 | 132865             | 121367          |
| Total length                      | 4306898         | 4555721         | 4734432         | 4183037         | 4975641                | 3517182            | 4556809         |
| Reference length                  | 4639675         | 4639675         | 4639675         | 4639675         | 4639675                | 4639675            | 4639675         |
| N50                               | 28697           | 32485           | 87102           | 22995           | <b>96171</b>           | 32051              | 20445           |
| NG50                              | 26662           | 32051           | 90607           | 18468           | <b>99933</b>           | 22648              | 19791           |
| N75                               | 11168           | 16969           | <b>40948</b>    | 8601            | 38463                  | 17097              | 8796            |
| NG75                              | 8392            | 15526           | 43468           | 4761            | <b>44599</b>           | 1002               | 8051            |
| No. of misassemblies              | 19              | <b>2</b>        | 9               | 6               | 11                     | <b>2</b>           | <b>2</b>        |
| No. of misassembled contigs       | 17              | <b>2</b>        | 9               | 6               | 11                     | <b>2</b>           | <b>2</b>        |
| Misassembled contigs length       | 257468          | 23485           | 57334           | 97258           | 46584                  | <b>16522</b>       | 22359           |
| No. of unaligned contigs          | 89 + 29 part    | 67 + 3 part     | 74 + 17 part    | 165 + 37 part   | 226 + 59 part          | <b>26 + 1 part</b> | 82 + 3 part     |
| Unaligned contigs length          | 218957          | 278346          | 346586          | 379343          | 462429                 | <b>75498</b>       | 277781          |
| No. of ambiguously mapped contigs | 10              | 22              | 24              | <b>4</b>        | 30                     | 21                 | 27              |
| Genome fraction (%)               | 86.544          | 93.577          | 95.896          | 81.360          | <b>96.993</b>          | 75.528             | 93.309          |
| Duplication ratio                 | 1.021           | <b>0.999</b>    | 1.002           | 1.009           | 1.025                  | <b>0.999</b>       | 1.001           |
| GC (%)                            | 50.21           | 50.08           | 49.92           | 49.92           | 49.69                  | 50.47              | 50.08           |
| Reference GC (%)                  | 50.79           | 50.79           | 50.79           | 50.79           | 50.79                  | 50.79              | 50.79           |
| No. of mismatches per 100 kb      | 9.55            | 2.08            | <b>1.34</b>     | 117.39          | 11.43                  | 2.27               | 1.85            |
| No. of indels per 100 kb          | 218.39          | 0.82            | <b>0.11</b>     | 11.61           | 0.75                   | 1.28               | 1.03            |
| No. of genes                      | 3442 + 408 part | 3816 + 194 part | 4030 + 127 part | 3060 + 555 part | <b>4071 + 133 part</b> | 3121 + 172 part    | 3662 + 348 part |
| No. of operons                    | 641 + 174 part  | 739 + 100 part  | 800 + 62 part   | 527 + 235 part  | <b>808 + 61 part</b>   | 605 + 100 part     | 650 + 190 part  |
| NA50                              | 28697           | 32485           | 87102           | 22249           | <b>95929</b>           | 32051              | 20139           |
| NGA50                             | 26580           | 32051           | 90607           | 16606           | <b>99913</b>           | 22648              | 19791           |
| NA75                              | 9943            | 16969           | <b>40948</b>    | 6180            | 38463                  | 17097              | 7745            |
| NGA75                             | 6991            | 15526           | 43468           | 2026            | <b>44599</b>           | 335                | 7235            |

Basic plots for *E. coli*.

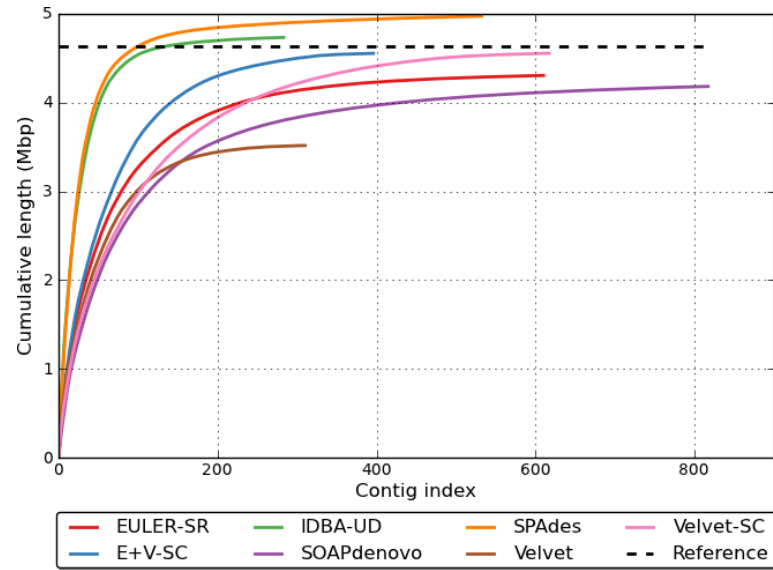

Supplementary Fig. S3: Cumulative length.

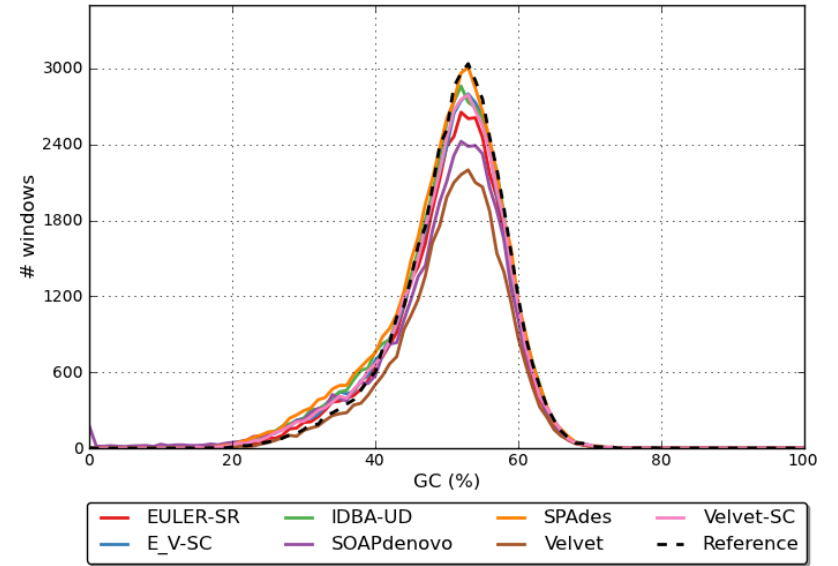

Supplementary Fig. S4: GC content.

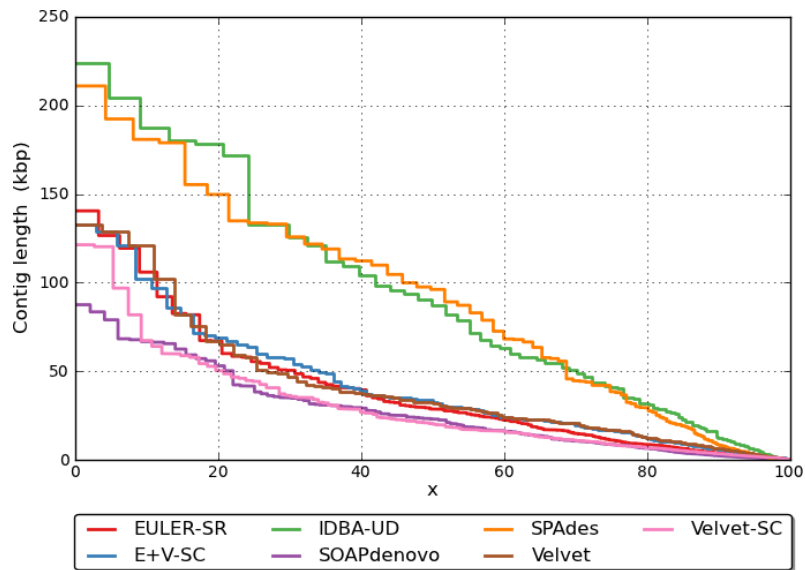

Supplementary Fig. S5: Nx.

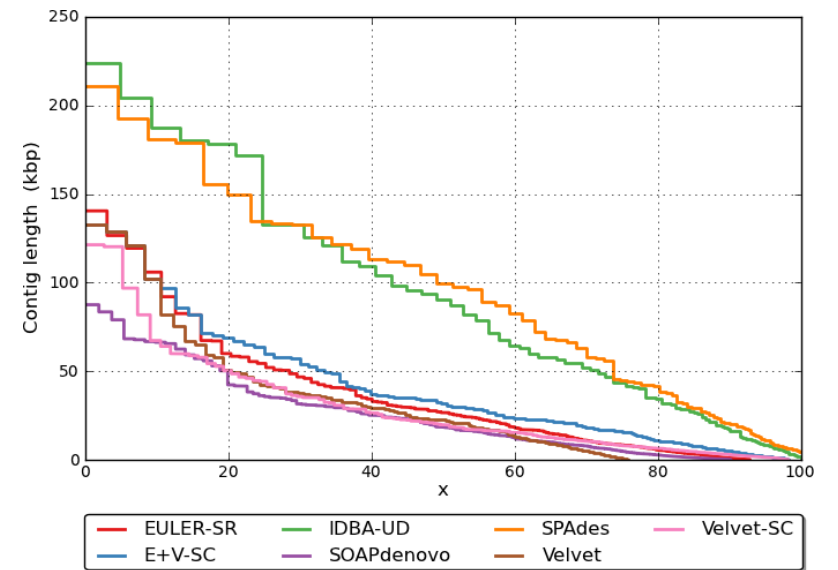

Supplementary Fig. S6: NGx.

Aligned statistic plots for *E. coli*.

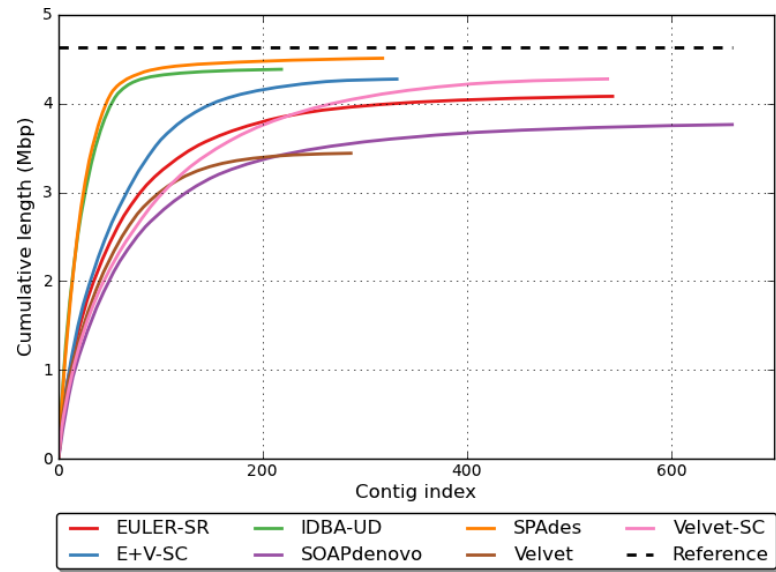

Supplementary Fig. S7: Cumulative length (aligned contigs).

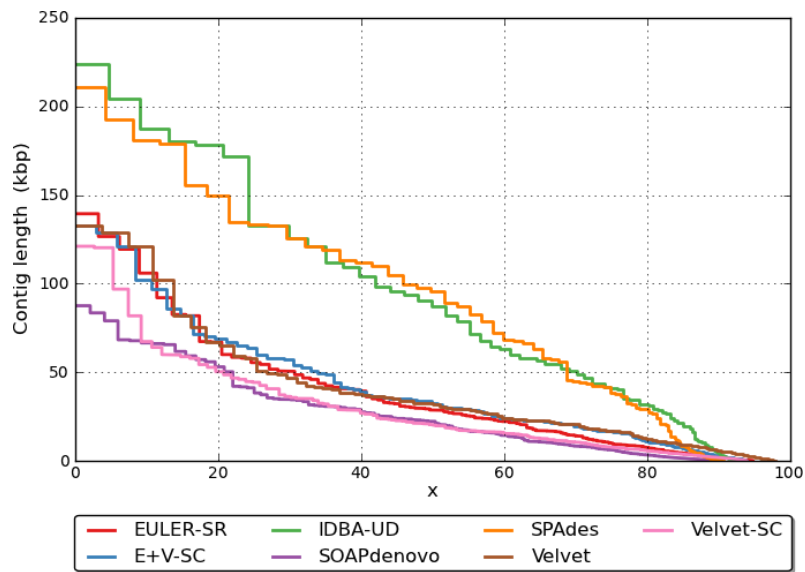

Supplementary Fig. S8: NAx.

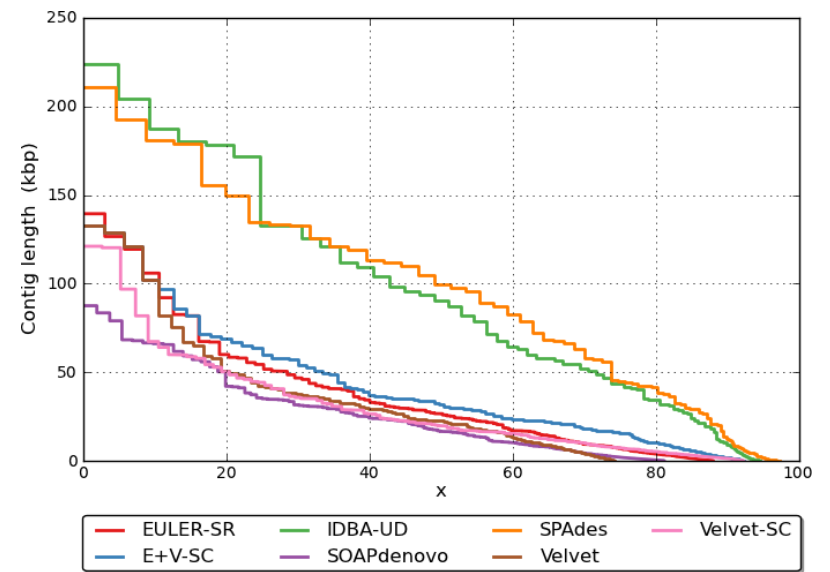

Supplementary Fig. S9: NGAx.

Genome fraction, genes and operons plots for *E. coli*.

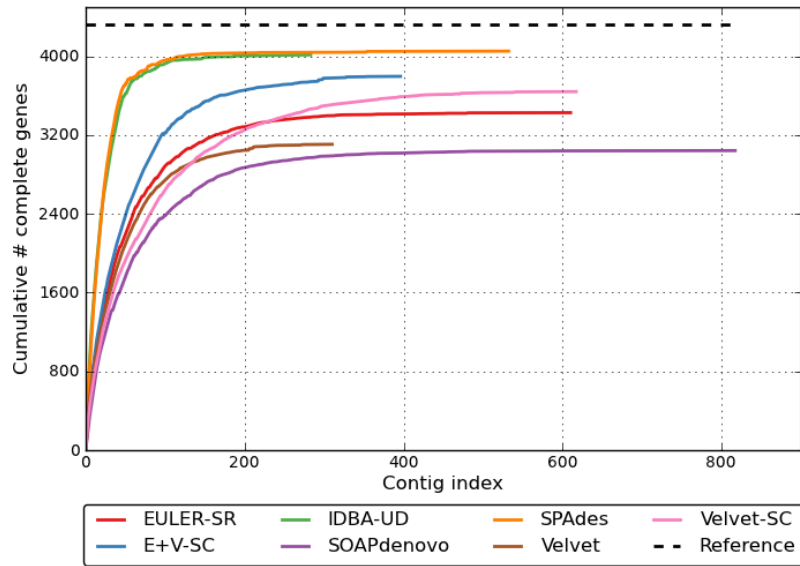

Supplementary Fig. S10: Cumulative No. of complete genes.

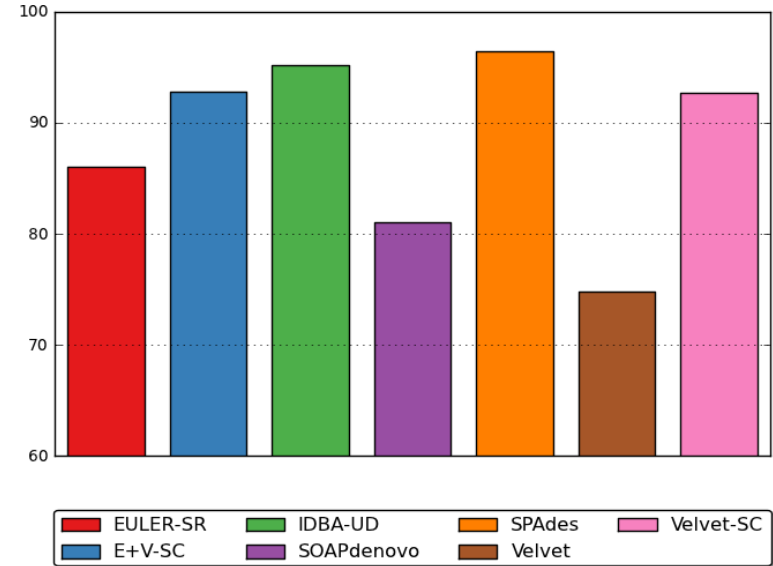

Supplementary Fig. S11: Genome fraction, %.

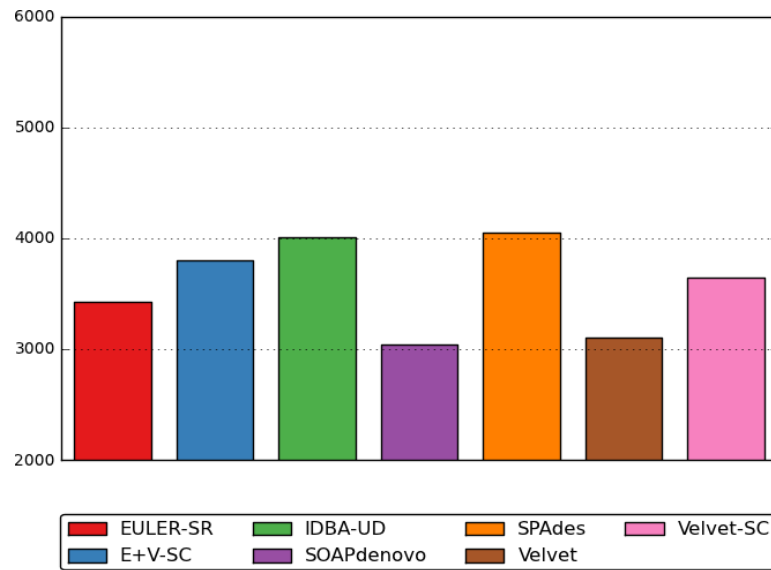

Supplementary Fig. S12: No. of complete genes.

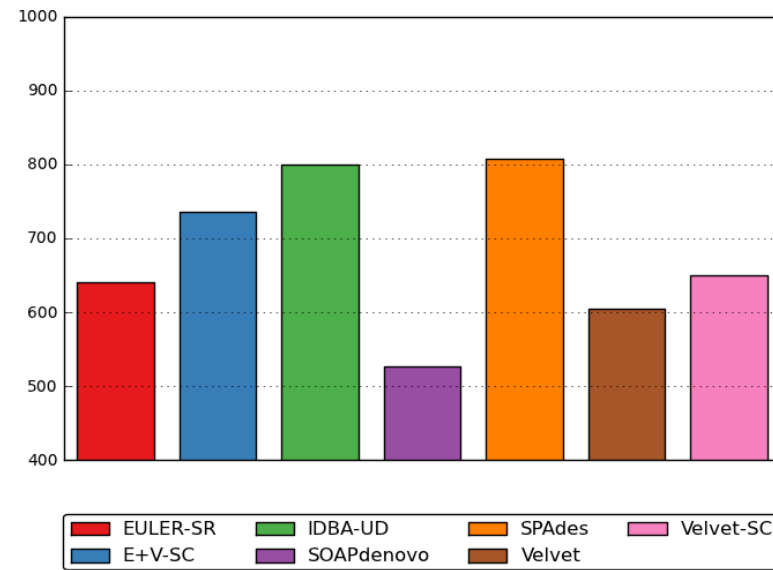

Supplementary Fig. S13: No. of complete operons.

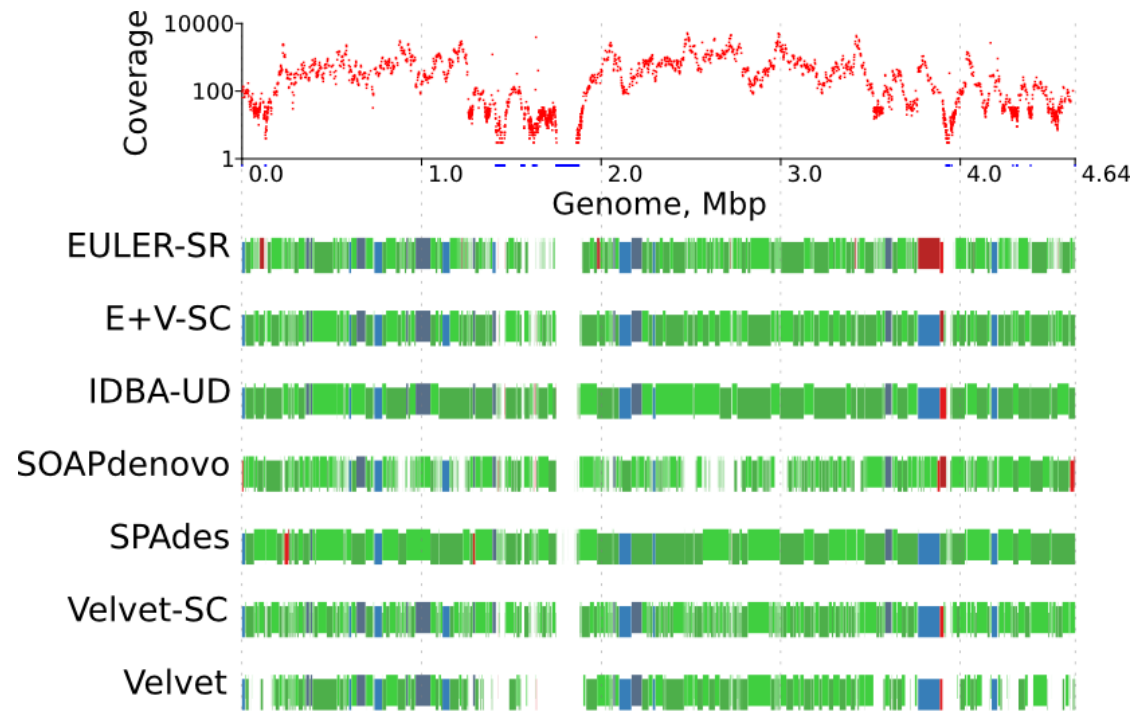

**Supplementary Fig. S14:** Contig alignment plot for *E. coli*.

Coverage plot (top):

- Coverage is averaged in 1000 bp bins.
- Blue dots below the x-axis indicate positions with zero coverage; this is not averaged over a bin.

Mapped contig plots:

- Contigs are mapped to the genome with Plantago, and split into one or more blocks at misassembly breakpoints. Each colored rectangle represents a block.
- Rectangles are staggered vertically for better plot comprehension.

Contig colors:

- **Green bars:** contigs without misassemblies.
- **Blue bars:** contigs with similar boundaries in at least half of all assemblies.
- **Red bars:** blocks after splitting misassembled contigs at misassembly breakpoints.
- **Orange bars:** blocks of misassembled contigs when the boundaries of the parts are similar in at least half of all assemblies.



#### 4 QUAST report on *H. sapiens*, chromosome 14

**Genome size:** 88.3 Mb. The reference genome is *H. sapiens* chr. 14 genomic contig, GRCh37.p10, available at the NCBI website.

**Number of genes:** 1449. Gene annotations were taken from <http://genome.ucsc.edu/cgi-bin/hgTables>.

**Only contigs of length  $\geq 200$  bp are used.**

The data set and all of its assemblies are taken from Salzberg *et al.* (2011).

**Supplementary Table S5:** Main table for *H. sapiens*, chromosome 14.

| Assembly              | ABYSS     | Allpaths-LG | Bambus2       | CABOG         | MSR-CA   | SGA      | SOAPdenovo | Velvet   |
|-----------------------|-----------|-------------|---------------|---------------|----------|----------|------------|----------|
| No. of contigs        | 51924     | 4529        | 13592         | <b>3361</b>   | 30103    | 56939    | 21818      | 45564    |
| NGA50                 | 2024      | 36284       | 5061          | <b>44934</b>  | 4820     | 2710     | 15091      | 2289     |
| Largest contig        | 30053     | 240773      | <b>736657</b> | 296904        | 53925    | 30350    | 147494     | 27872    |
| Total length          | 73341066  | 84435699    | 68243005      | 86232753      | 83291373 | 82375466 | 92488595   | 74740589 |
| Genome fraction (%)   | 82.228    | 95.255      | 79.334        | <b>98.248</b> | 94.111   | 93.557   | 98.094     | 84.415   |
| No. of misassemblies  | <b>20</b> | 115         | 3372          | 174           | 2423     | 219      | 5311       | 385      |
| No. of complete genes | 205       | 669         | 311           | <b>718</b>    | 324      | 259      | 437        | 212      |

**Supplementary Table S6:** Misassemblies report for *H. sapiens*, chromosome 14.

| Assembly                    | ABYSS        | Allpaths-LG | Bambus2  | CABOG   | MSR-CA  | SGA       | SOAPdenovo | Velvet |
|-----------------------------|--------------|-------------|----------|---------|---------|-----------|------------|--------|
| No. of misassemblies        | <b>20</b>    | 115         | 3372     | 174     | 2423    | 219       | 5311       | 385    |
| No. of relocations          | <b>20</b>    | 114         | 3367     | 170     | 2411    | 219       | 5171       | 378    |
| No. of translocations       | 0            | 0           | 0        | 0       | 0       | 0         | 0          | 0      |
| No. of inversions           | <b>0</b>     | 1           | 5        | 4       | 12      | <b>0</b>  | 140        | 7      |
| No. of misassembled contigs | <b>20</b>    | 100         | 1069     | 118     | 2297    | 197       | 2700       | 358    |
| Misassembled contigs length | <b>98963</b> | 1771098     | 12946575 | 5344856 | 6945874 | 287139    | 41103208   | 769621 |
| No. of local misassemblies  | 158          | 244         | 2256     | 500     | 622     | <b>31</b> | 8180       | 867    |
| No. of mismatches           | <b>60453</b> | 78645       | 65375    | 80517   | 146027  | 70823     | 104783     | 78110  |
| No. of indels               | <b>20672</b> | 64632       | 93721    | 69534   | 55058   | 25345     | 75116      | 84544  |

**Supplementary Table S7:** Extended report for *H. sapiens*, chromosome 14.

| Assembly                          | ABySS         | Allpaths-LG      | Bambus2       | CABOG               | MSR-CA        | SGA           | SOAPdenovo    | Velvet        |
|-----------------------------------|---------------|------------------|---------------|---------------------|---------------|---------------|---------------|---------------|
| No. of contigs                    | 51924         | 4529             | 13592         | <b>3361</b>         | 30103         | 56939         | 21818         | 45564         |
| Largest contig                    | 30053         | 240773           | <b>736657</b> | 296904              | 53925         | 30350         | 147494        | 27872         |
| Total length                      | 73341066      | 84435699         | 68243005      | 86232753            | 83291373      | 82375466      | 92488595      | 74740589      |
| Reference length                  | 88289540      | 88289540         | 88289540      | 88289540            | 88289540      | 88289540      | 88289540      | 88289540      |
| N50                               | 2776          | 38359            | 8430          | <b>46694</b>        | 5345          | 2981          | 15762         | 2887          |
| NG50                              | 2024          | 36530            | 5851          | <b>45336</b>        | 4906          | 2710          | 16662         | 2294          |
| N75                               | 1230          | 20271            | 4224          | <b>26111</b>        | 2538          | 1376          | 6516          | 1435          |
| NG75                              | 550           | 17552            | 1336          | <b>24395</b>        | 2112          | 1086          | 7626          | 784           |
| No. of misassemblies              | <b>20</b>     | 115              | 3372          | 174                 | 2423          | 219           | 5311          | 385           |
| No. of misassembled contigs       | <b>20</b>     | 100              | 1069          | 118                 | 2297          | 197           | 2700          | 358           |
| Misassembled contigs length       | <b>98963</b>  | 1771098          | 12946575      | 5344856             | 6945874       | 287139        | 41103208      | 769621        |
| No. of unaligned contigs          | 35+86 part    | <b>5+45 part</b> | 211+426 part  | 19+39 part          | 319+1804 part | 167+443 part  | 82+251 part   | 900+519 part  |
| Unaligned contigs length          | 23686         | <b>8529</b>      | 193119        | 19322               | 566781        | 63785         | 167308        | 564483        |
| No. of ambiguously mapped contigs | 168           | 6                | 15            | 3                   | 12            | <b>0</b>      | <b>0</b>      | <b>0</b>      |
| Genome fraction (%)               | 82.228        | 95.255           | 79.334        | <b>98.248</b>       | 94.111        | 93.557        | 98.094        | 84.415        |
| Duplication ratio                 | 1.015         | 1.004            | <b>0.978</b>  | 1.008               | 0.998         | 1.003         | 1.078         | 1.001         |
| GC (%)                            | 39.69         | 40.77            | 40.20         | 40.80               | 40.45         | 40.46         | 40.80         | 39.78         |
| Reference GC (%)                  | 40.89         | 40.89            | 40.89         | 40.89               | 40.89         | 40.89         | 40.89         | 40.89         |
| No. of mismatches per 100 kb      | <b>82.45</b>  | 93.20            | 96.19         | 93.45               | 176.74        | 86.05         | 114.20        | 105.41        |
| No. of indels per 100 kb          | <b>28.20</b>  | 76.60            | 137.90        | 80.70               | 66.64         | 30.80         | 81.87         | 114.10        |
| No. of genes                      | 205+1203 part | 669+766 part     | 311+1098 part | <b>718+729 part</b> | 324+1120 part | 259+1178 part | 437+1008 part | 212+1203 part |
| NA50                              | 2776          | 37827            | 7066          | <b>45936</b>        | 5232          | 2981          | 14188         | 2883          |
| NGA50                             | 2024          | 36284            | 5061          | <b>44934</b>        | 4820          | 2710          | 15091         | 2289          |
| NA75                              | 1230          | 20014            | 3766          | <b>26111</b>        | 2401          | 1376          | 5512          | 1433          |
| NGA75                             | 550           | 17382            | 1228          | <b>24395</b>        | 2002          | 1086          | 6535          | 779           |

Basic plots for *H. sapiens*, chromosome 14.

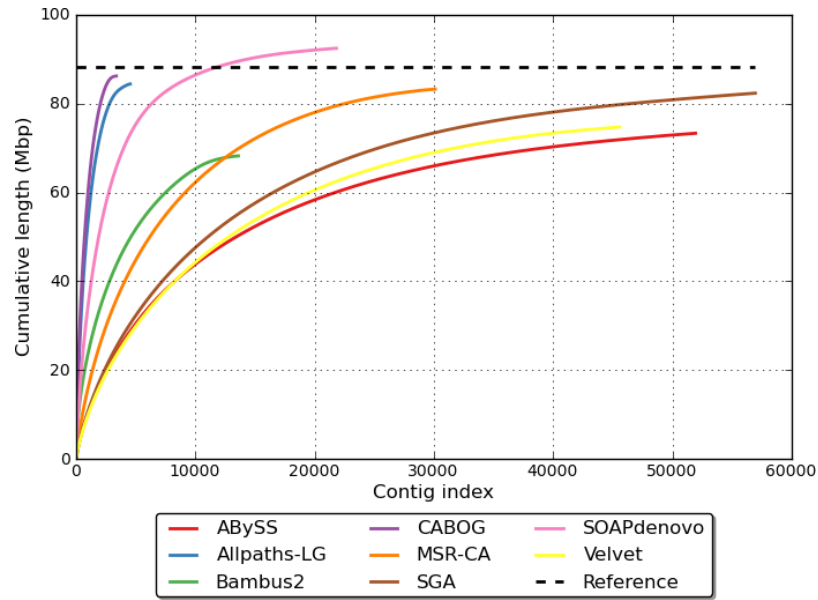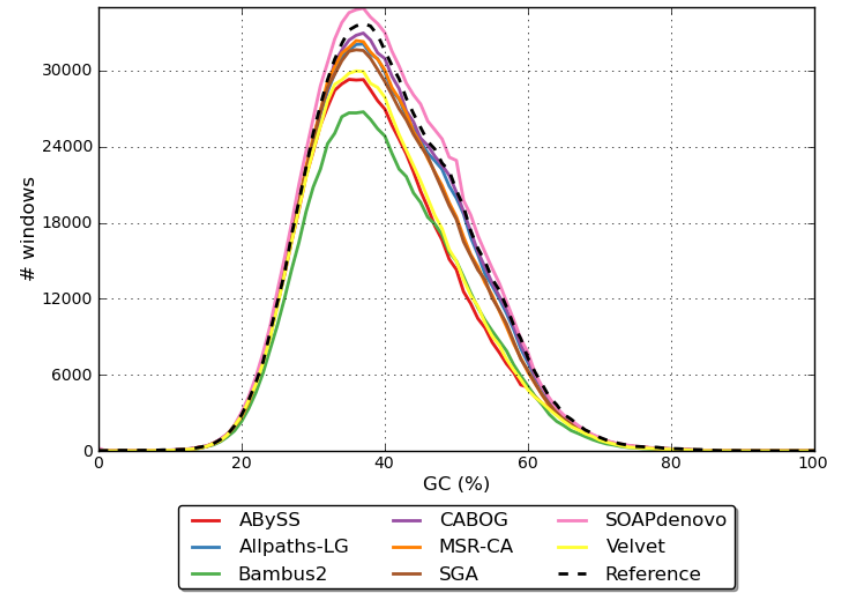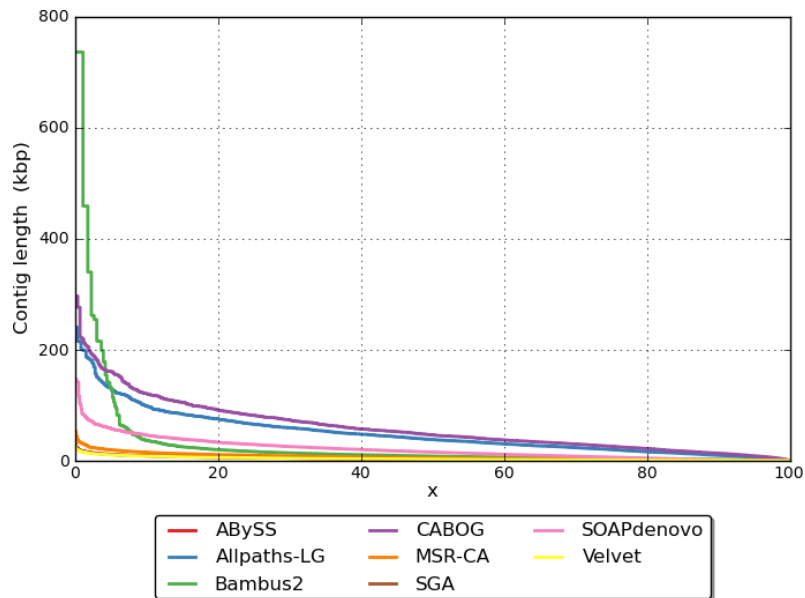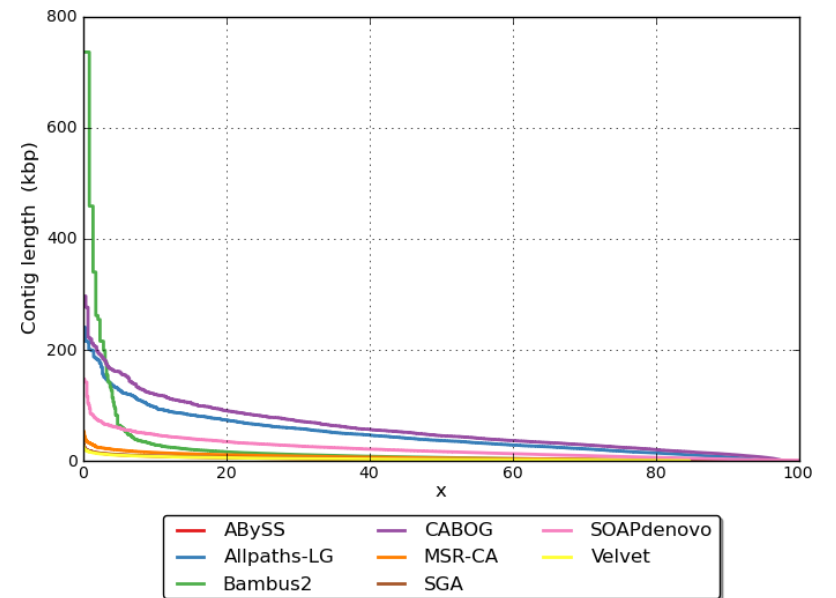

Aligned statistic plots for *H. sapiens*, chromosome 14.

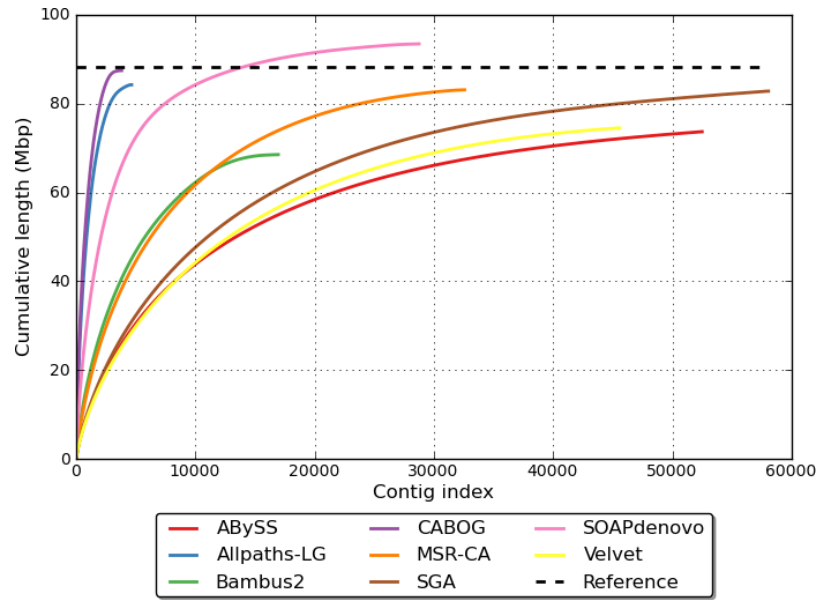

Supplementary Fig. S19: Cumulative length (aligned contigs).

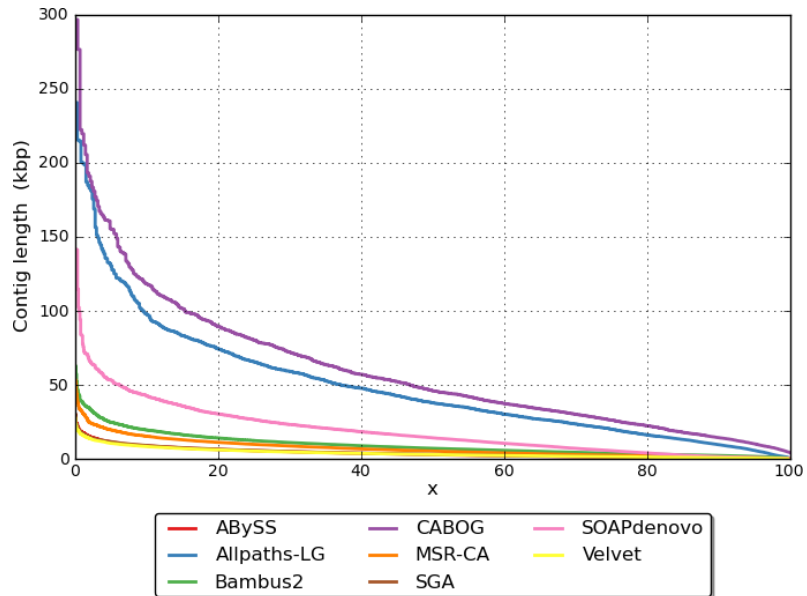

Supplementary Fig. S20: NAx.

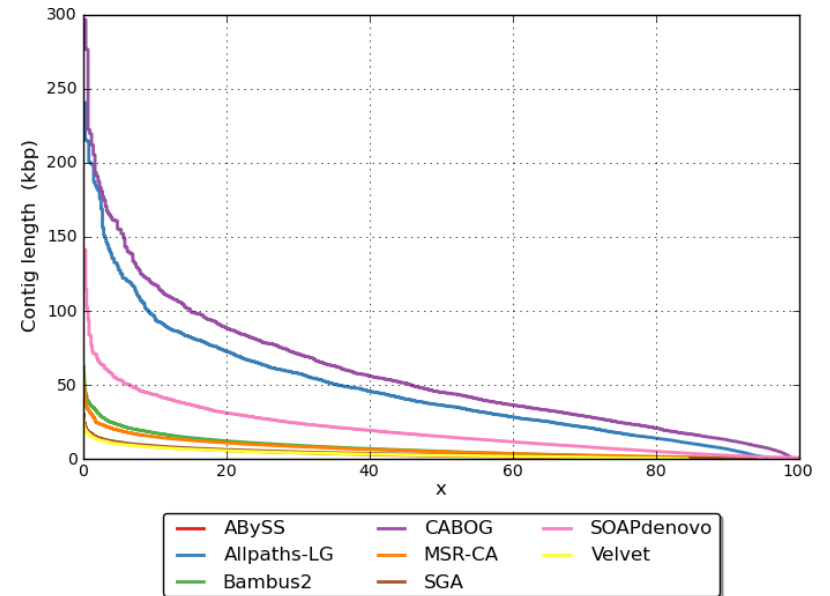

Supplementary Fig. S21: NGAx.

Genome fraction, genes and operons plots for *H. sapiens*, chromosome 14.

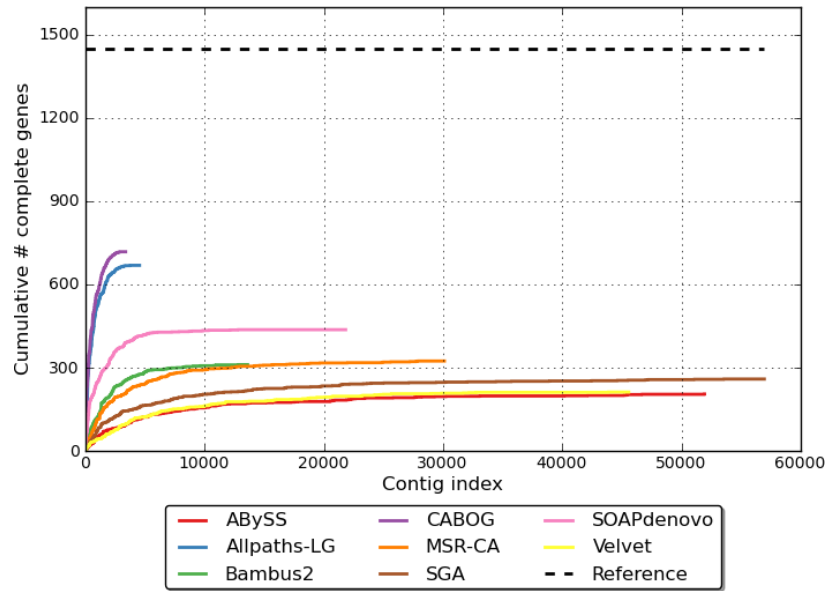

Supplementary Fig. S22: Cumulative No. of complete genes.

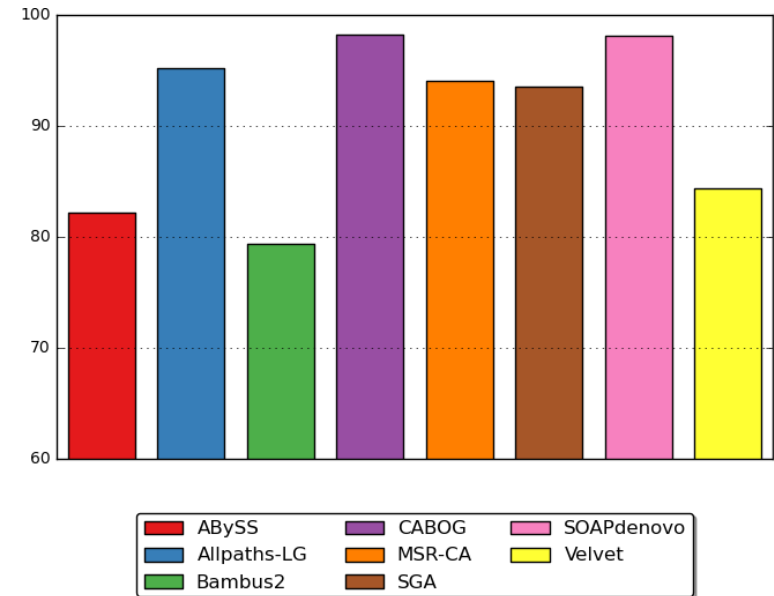

Supplementary Fig. S23: Genome fraction, %.

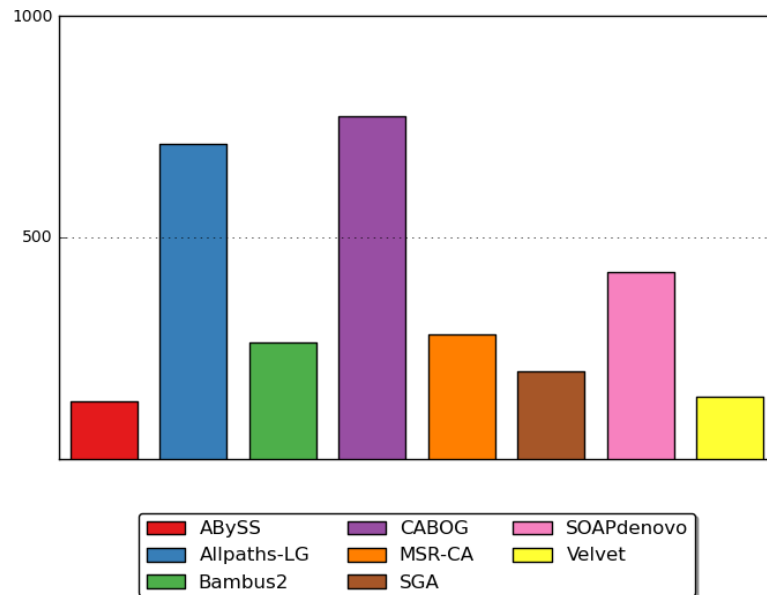

Supplementary Fig. S24: No. of complete genes.

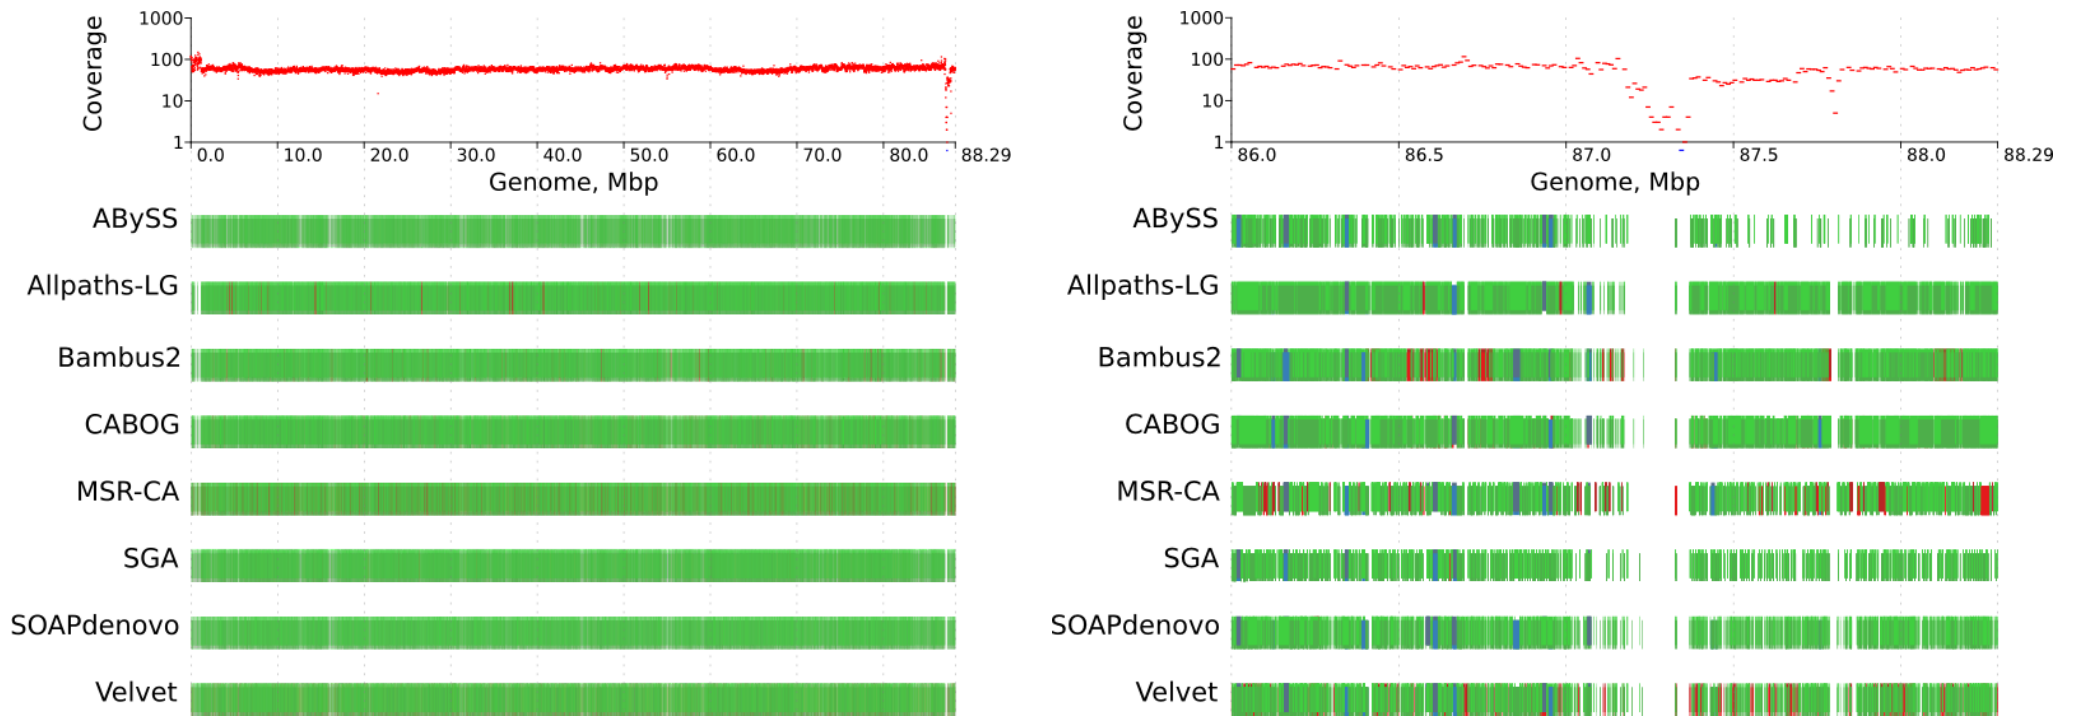

**Supplementary Fig. S25:** Contig alignment plots for *H. sapiens*, chromosome 14. *Left:* The whole chromosome. *Right:* Region at the end of the chromosome.

Coverage plot (top):

- Coverage is averaged in 1000 bp bins.
- Blue dots below the x-axis indicate positions with zero coverage; this is not averaged over a bin.

Mapped contig plots:

- Contigs are mapped to the genome with Plantago, and split into one or more blocks at misassembly breakpoints. Each colored rectangle represents a block.
- Rectangles are staggered vertically for better plot comprehension.

Contig colors:

- **Green bars:** contigs without misassemblies.
- **Blue bars:** contigs with similar boundaries in at least half of all assemblies.
- **Red bars:** blocks after splitting misassembled contigs at misassembly breakpoints.
- **Orange bars:** blocks of misassembled contigs when the boundaries of the parts are similar in at least half of all assemblies.

## 5 QUAST report on *B. impatiens*

Estimated genome size: 250 Mb (used for NGx statistics).

Only contigs of length  $\geq 200$  bp are used.

Since there is no finished genome for *B. impatiens*, reference-based statistics cannot be computed. However, we ran GlimmerHMM (Majoros *et al.*, 2004) to find potential genes.

The data set and all of its assemblies are taken from Salzberg *et al.* (2011).

**Supplementary Table S8:** Extended report for *B. impatiens*.

| Assembly                                 | AB <sub>y</sub> SS | CABOG     | MSR-CA    | SOAPdenovo    |
|------------------------------------------|--------------------|-----------|-----------|---------------|
| No. of contigs                           | 40451              | 22107     | 21885     | <b>15957</b>  |
| Largest contig                           | 177883             | 297795    | 311566    | <b>523622</b> |
| Total length                             | 245097922          | 233471993 | 237757432 | 244248450     |
| Estimated reference length               | 250000000          | 250000000 | 250000000 | 250000000     |
| N50                                      | 14791              | 25852     | 34797     | <b>58901</b>  |
| NG50                                     | 14383              | 23515     | 32431     | <b>57117</b>  |
| N75                                      | 6767               | 11811     | 15431     | <b>26464</b>  |
| NG75                                     | 6365               | 9467      | 12779     | <b>24625</b>  |
| GC (%)                                   | 37.65              | 37.60     | 37.77     | 37.75         |
| No. of predicted genes (unique)          | <b>39905</b>       | 34113     | 36753     | 34319         |
| No. of predicted genes ( $\geq 0$ bp)    | <b>41421</b>       | 34143     | 36863     | 34388         |
| No. of predicted genes ( $\geq 300$ bp)  | <b>23504</b>       | 20779     | 22912     | 22645         |
| No. of predicted genes ( $\geq 1500$ bp) | <b>6453</b>        | 6034      | 6240      | 6407          |
| No. of predicted genes ( $\geq 3000$ bp) | 2917               | 2775      | 2919      | <b>2992</b>   |

Basic plots for *B. impatiens*.

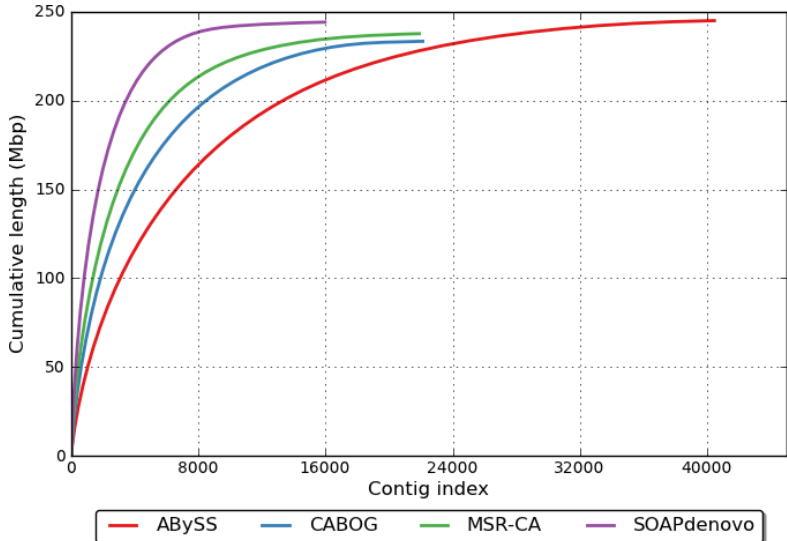

Supplementary Fig. S26: Cumulative length.

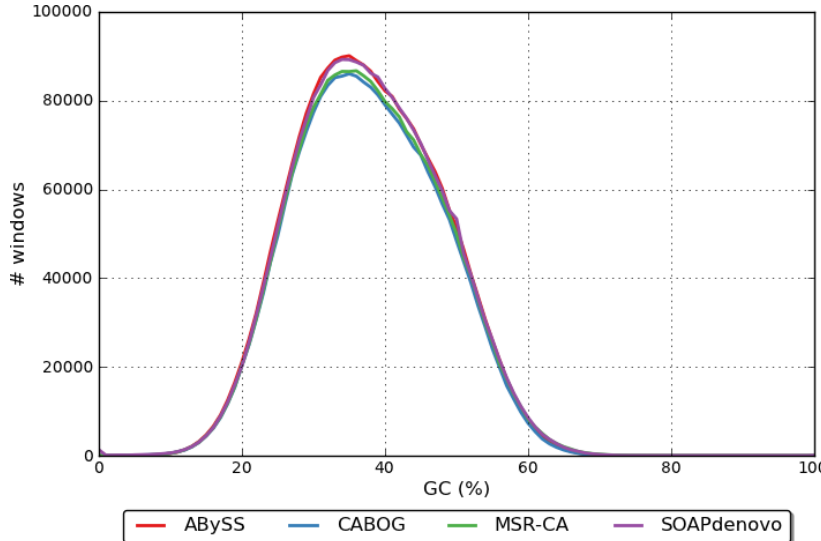

Supplementary Fig. S27: GC content.

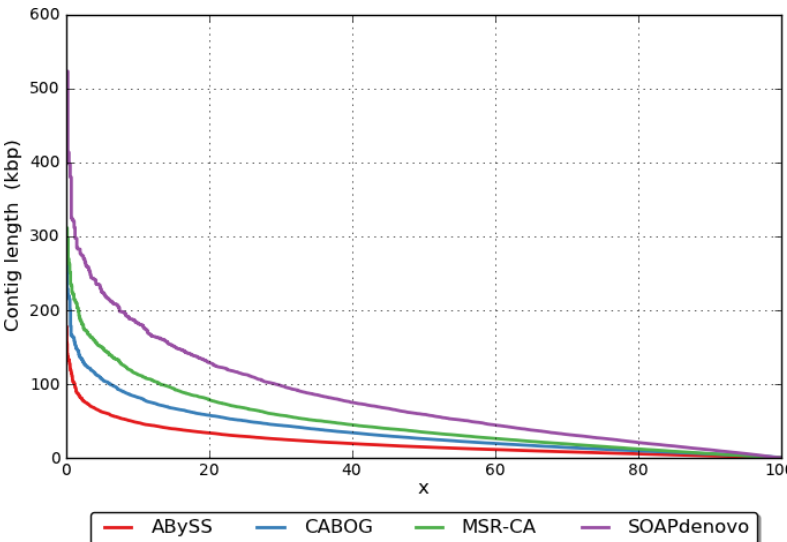

Supplementary Fig. S28: Nx.

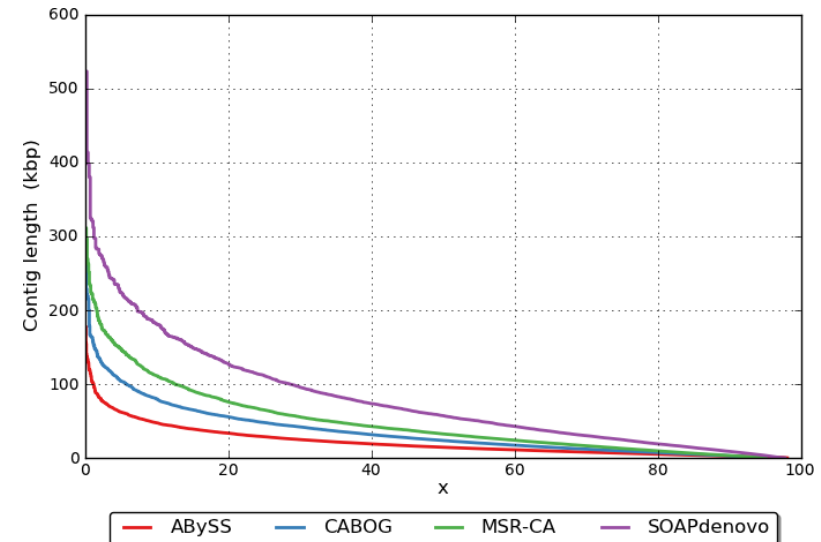

Supplementary Fig. S29: NGx.



## 6 List of used assemblers

We used thirteen assemblers in the comparisons:

- ABySS (Simpson *et al.*, 2009)
- Allpaths-LG (Gnerre *et al.*, 2011)
- Bambus2 (Koren *et al.*, 2011)
- CABOG (Miller *et al.*, 2008)
- EULER-SR (Pevzner *et al.*, 2001)
- IDBA-UD (Peng *et al.*, 2012)
- MSR-CA (<http://www.genome.umd.edu/>)
- SGA (Simpson and Durbin, 2012)
- SOAPdenovo (Li *et al.*, 2010)
- SPAdes (Bankevich *et al.*, 2012)
- Velvet (Zerbino and Birney, 2008)
- Velvet-SC, EULER+Velvet-SC (Chitsaz *et al.*, 2011)

## References

- Bankevich, A. *et al.* (2012). SPAdes: A New Genome Assembly Algorithm and Its Applications to Single-Cell Sequencing. *J Comput Biol*, **19**(5), 455–477.
- Chitsaz, H. *et al.* (2011). Efficient de novo assembly of single-cell bacterial genomes from short-read data sets. *Nature Biotechnol.*, **29**(10), 915–921.
- Gnerre, S. *et al.* (2011). High-quality draft assemblies of mammalian genomes from massively parallel sequence data. *Proc Natl Acad Sci U S A.*, **108**(4), 1513–1518.
- Koren, S. *et al.* (2011). Bambus 2: scaffolding metagenomes. *Bioinformatics*, **27**(21), 2964–2971.
- Kurtz, S. *et al.* (2004). Versatile and open software for comparing large genomes. *Genome Biol*, **5**(2), R12.
- Li, R. *et al.* (2010). De novo assembly of human genomes with massively parallel short read sequencing. *Genome Res*, **20**(2), 265–272.
- Majoros, W. H., Pertea, M., and Salzberg, S. L. (2004). TigrScan and GlimmerHMM: two open source ab initio eukaryotic gene-finders. *Bioinformatics*, **20**(16), 2878–2879.
- Miller, J. R. *et al.* (2008). Aggressive assembly of pyrosequencing reads with mates. *Bioinformatics*, **24**(24), 2818–2824.
- Peng, Y. *et al.* (2012). IDBA-UD: A de novo assembler for single-cell and metagenomic sequencing data with highly uneven depth. *Bioinformatics*, **28**(11), 1–8.
- Pevzner, P. A. *et al.* (2001). An Eulerian path approach to DNA fragment assembly. *Proc Natl Acad Sci U S A*, **98**(17), 9748–9753.

Salzberg, S. L. *et al.* (2011). GAGE: A critical evaluation of genome assemblies and assembly algorithms. *Genome Res*, **22**(3), 557–567.

Simpson, J. *et al.* (2009). ABySS: a parallel assembler for short read sequence data. *Genome Res*, **19**(6), 1117–1123.

Simpson, J. T. and Durbin, R. (2012). Efficient de novo assembly of large genomes using compressed data structures. *Genome Res*, **22**(3), 549–556.

Zerbino, D. and Birney, E. (2008). Velvet: algorithms for de novo short read assembly using de Bruijn graphs. *Genome Res*, **18**(5), 821–829.
